# Supplementary material for: The impact of electron–phonon coupling on the figure of merit of Nb2SiTe4 and Nb2GeTe4 ternary monolayers
Source: Royal Society of Chemistry journal article supplement (doi:10.1039/d1cp01967h), 2021-01-01
Supplement: d1cp01967h1.pdf [file d1cp01967h1.pdf]

# The Impact of Electron-Phonon Coupling on the Figure of Merit of Ternary Monolayers

## Nb<sub>2</sub>SiTe<sub>4</sub> and Nb<sub>2</sub>GeTe<sub>4</sub>

Muhammad Sajjad<sup>a</sup>, Nirpendra Singh<sup>a,b\*</sup>

<sup>a</sup>Department of Physics, Khalifa University of Science and Technology, Abu Dhabi-127788,

United Arab Emirates (UAE)

<sup>b</sup>Center for Catalysis and Separation (CeCaS), Khalifa University of Science and Technology, Abu Dhabi-127788, United Arab Emirates (UAE)

Table S1: The calculated relaxation times at room temperatures using deformation potential theory (DPT). The values of carrier mobilities and their effective masses are taken from the previous study.

| Monolayer                         | carrier type | $\mu$ (cm <sup>2</sup> /V.s) |            | $m$ ( $m_e$ ) |          | $\tau$ (10 <sup>-13</sup> s) |             |
|-----------------------------------|--------------|------------------------------|------------|---------------|----------|------------------------------|-------------|
|                                   |              | $\mu_{xx}$                   | $\mu_{yy}$ | $m_{xx}$      | $m_{yy}$ | $\tau_{xx}$                  | $\tau_{yy}$ |
| Nb <sub>2</sub> SiTe <sub>4</sub> | hole         | 75.45                        | 201        | 1.30          | 4.65     | 0.56                         | 5.31        |
|                                   | electron     | 4570                         | 4040       | 0.47          | 0.29     | 12.2                         | 6.66        |
| Nb <sub>2</sub> GeTe <sub>4</sub> | hole         | 192                          | 406        | 0.77          | 4.60     | 0.84                         | 10.6        |
|                                   | electron     | 1910                         | 2210       | 0.66          | 0.32     | 7.16                         | 4.02        |

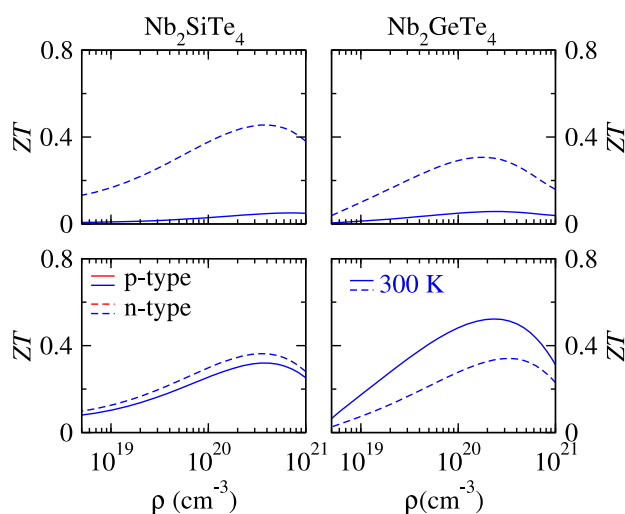

Fig. S1: The calculated figure of merit of Nb<sub>2</sub>SiTe<sub>4</sub> and Nb<sub>2</sub>GeTe<sub>4</sub> along x (1<sup>st</sup> row) and y (2<sup>nd</sup> row) direction. The values of  $\tau$  are inserted as calculated with DPT.
